# Supplementary material
Source: Springer Nature journal article supplement (https://www.springermedizin.de/resource/supplementary/12943_2013_1137_MOESM10_ESM.pdf/9552568)
Supplement: MOESM10 [file 9552568]

# MV vs FEMX

|            |            |            |            |
|------------|------------|------------|------------|
| PC 34:1**  | PS 34:1**  | PE 34:1**  | PI 34:1**  |
| PC 34:2**  | PS 34:2    | PE 34:2*** | PI 34:2**  |
| PC 34:3*   | PS 34:3*   | PE 34:3*** | PI 34:3*   |
| PC 36:1*** | PS 36:1**  | PE 36:1    | PI 36:1    |
| PC 36:2**  | PS 36:2*** | PE 36:2    | PI 36:2**  |
| PC 36:3**  | PS 36:3    | PE 36:3**  | PI 36:3*** |
| PC 36:4*   | PS 36:4    | PE 36:4**  | PI 36:4    |
| PC 38:0*** | PS 38:0    | PE 38:0**  | PI 38:0    |
| PC 38:1    | PS 38:1*   | PE 38:1    | PI 38:1*   |
| PC 38:2    | PS 38:2**  | PE 38:2    | PI 38:2**  |
| PC 38:3**  | PS 38:3*   | PE 38:3*   | PI 38:3**  |
| PC 38:4    | PS 38:4    | PE 38:4**  | PI 38:4**  |
| PC 38:5    | PS 38:5    | PE 38:5*   | PI 38:5*   |
| PC 38:6    | PS 38:6    | PE 38:6*** | PI 38:6    |
| PC 40:2    | PS 40:2**  | PE 40:2    | PI 40:2*** |
| PC 40:3    | PS 40:3    | PE 40:3    | PI 40:3    |
| PC 40:4    | PS 40:4**  | PE 40:4    | PI 40:4    |
| PC 40:5    | PS 40:5    | PE 40:5*   | PI 40:5    |
| PC 40:6    | PS 40:6    | PE 40:6    | PI 40:6    |
| PC 40:7    | PS 40:7    | PE 40:7    | PI 40:7    |
| PC 42:5*   | PS 42:5    | PE 42:5    | PI 42:5    |
| PC 42:8    | PS 42:8    | PE 42:8    | PI 42:8    |
| PC 42:9    | PS 42:9    | PE 42:9    | PI 42:9*   |
|            |            | PE 28:0**  |            |
| PC 28:1    |            | PE 28:1    |            |
| PC 30:0**  |            | PE 30:0*** |            |
| PC 30:1*   |            | PE 30:1*** |            |
| PC 32:0**  | PS 32:0    | PE 32:0*   |            |
| PC 32:1*** | PS 32:1**  | PE 32:1*** |            |
| PC 32:2*** |            | PE 32:2*** |            |
| PC 34:0    | PS 34:0    |            |            |
| PC 34:4    |            | PE 34:4*   | PI 34:4    |
| PC 36:0    | PS 36:0    | PE 36:0    |            |
|            | PS 36:5    | PE 36:5*** | PI 36:5*   |
| PC 36:6    |            | PE 36:6    | PI 36:6*** |
|            | PS 38:7**  |            | PI 38:7    |
|            |            |            | PI 40:0    |
|            | PS 40:1*   |            | PI 40:1    |
| PC 40:8    | PS 40:8    |            | PI 40:8**  |
| PC 42:10   | PS 42:10   | PE 42:10   |            |
| PC 42:11   | PS 42:11   |            |            |
| PC 42:2    |            | PE 42:2    | PI 42:2    |
| PC 42:3    |            | PE 42:3    | PI 42:3*   |
| PC 42:4    |            |            |            |
|            | PS 42:6    | PE 42:6**  |            |
|            | PS 42:7    | PE 42:7**  | PI 42:7    |
|            | PS 44:10   |            | PI 44:10   |
|            | PS 44:11   |            |            |
| PC 44:12   | PS 44:12   | PE 44:12   |            |
|            | PS 44:2    | PE 44:2    | PI 44:2    |
|            | PS 44:3    | PE 44:3*   |            |
| PC 44:4    | PS 44:4    | PE 44:4    |            |
| PC 44:5    | PS 44:5    |            |            |
|            | PS 44:6    | PE 44:6    |            |
|            | PS 44:7    | PE 44:7    | PI 44:7    |
|            | PS 44:8    |            | PI 44:8    |
| PC 44:9    |            | PE 44:9    |            |
